# Supplementary material for: Origin and Evolution of Protein Fold Designs Inferred from Phylogenomic Analysis of CATH Domain Structures in Proteomes
Source: PLOS journal article supplement (doi:10.1371/journal.pcbi.1003009), 2013-03-28
Supplement: S2 (10.1371/journal.pcbi.1003009.s002) [file journal.pcbi.1003009.s002]

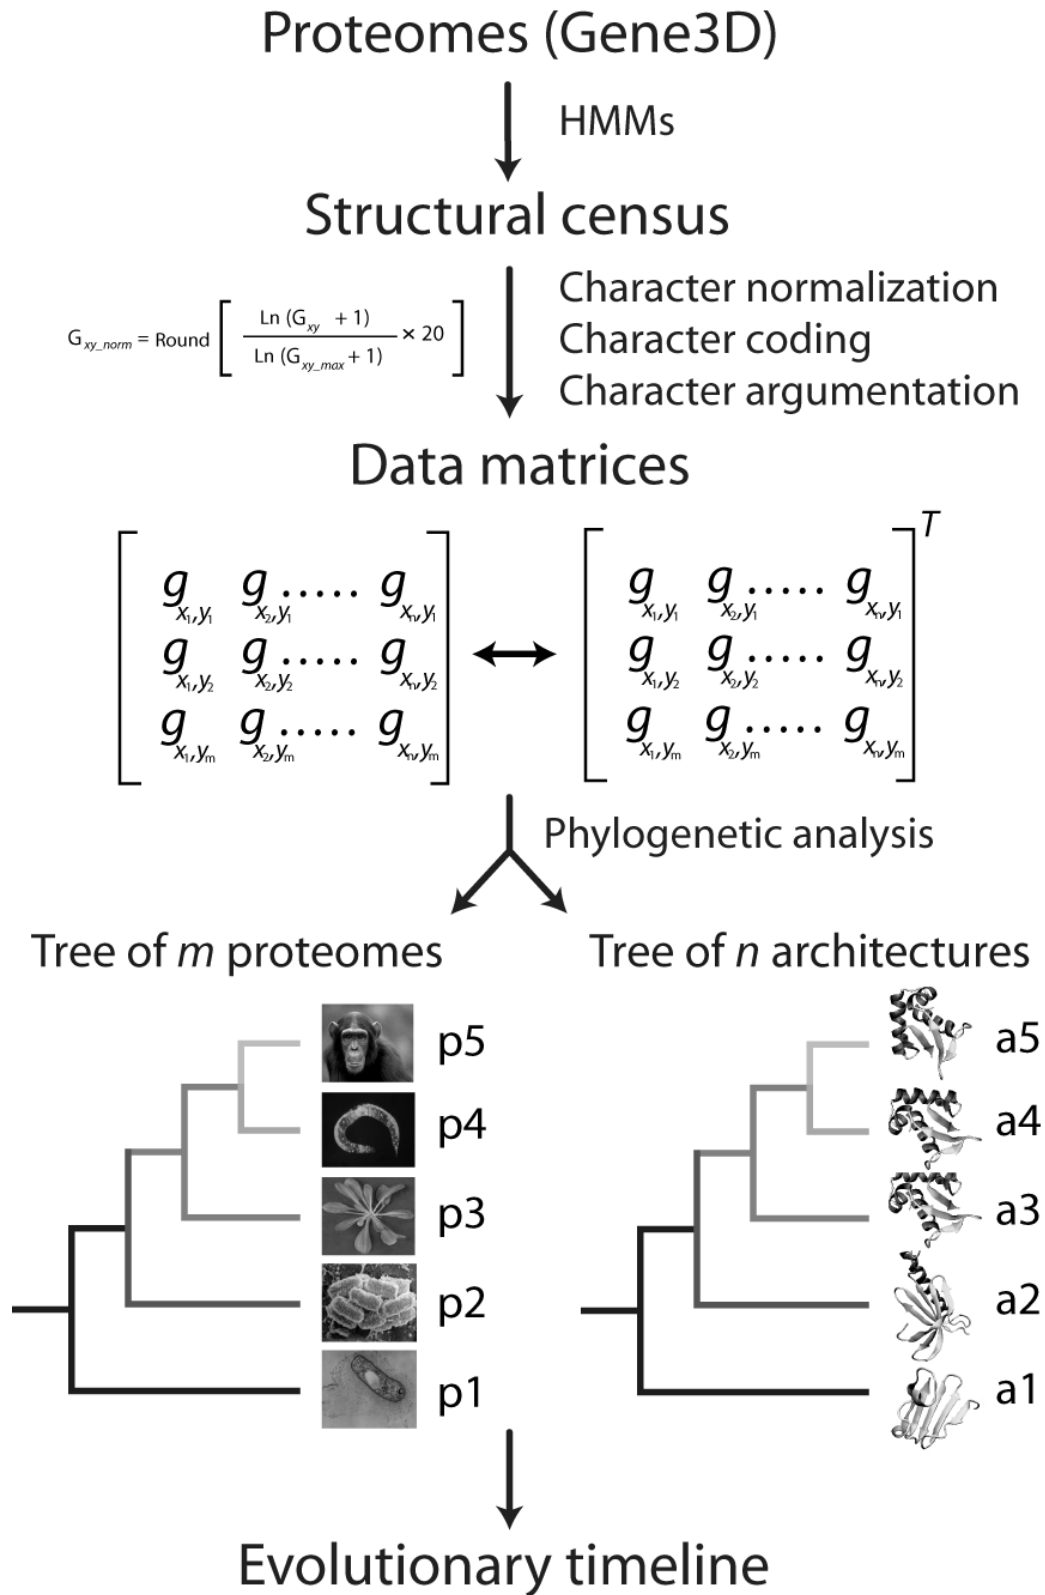

**Figure S1 A methodological flowchart illustrating the reconstruction of phylogenies of proteomes and protein architectures using protein domain census data.**
